# Supplementary material
Source: Springer Nature journal article supplement (https://www.springermedizin.de/resource/supplementary/12885_2004_155_MOESM12_ESM.pdf/9469030)

**1,**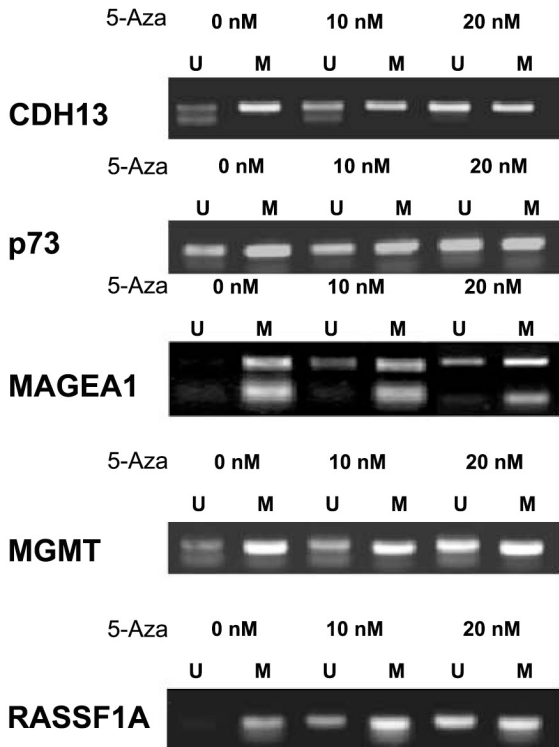**2,**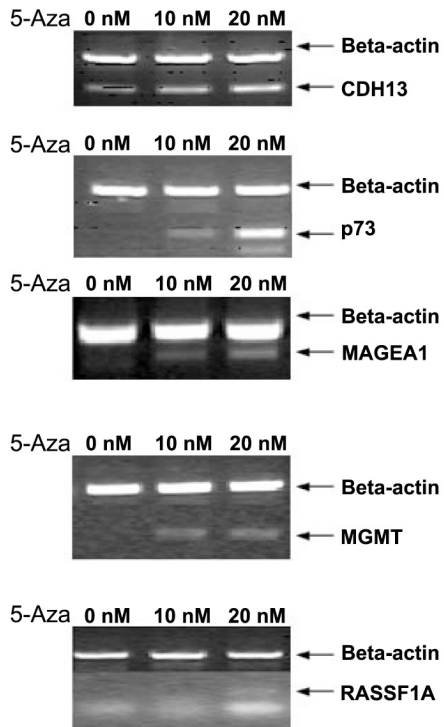

Supplement: MOESM12 [file 9469030]
